# Supplementary material for: Fe(III) and Cu(II) Complexes of Chlorogenic Acid: Spectroscopic, Thermal, Anti-/Pro-Oxidant, and Cytotoxic Studies
Source: MDPI journal article supplement (doi:10.3390/ma15196832), 2022-10-01
Supplement: s1 [file s1]

*Supplementary materials*

# **Fe(III) and Cu(II) complexes of chlorogenic acid: spectroscopic, thermal, anti-/pro-oxidant and cytotoxic studies**

**Monika Kalinowska <sup>1,\*</sup>, Kamila Gryko <sup>1</sup>, Ewelina Gołębiewska <sup>1</sup>, Grzegorz Świdorski <sup>1</sup>, Hanna Lewandowska <sup>2</sup>, Marek Pruszyński <sup>2,3</sup>, Małgorzata Zawadzka <sup>1</sup>, Maciej Kozłowski <sup>1</sup>, Justyna Sienkiewicz-Gromiuk <sup>4</sup>, Włodzimierz Lewandowski <sup>1</sup>**

1 Department of Chemistry, Biology and Biotechnology, Institute of Environmental Engineering and Energetics, Faculty of Civil Engineering and Environmental Sciences, Białystok University of Technology, Wiejska 45E Street, 15-351 Białystok, Poland

2 Institute of Nuclear Chemistry and Technology, 16 Dorodna Street, 03-195 Warsaw, Poland

3 NOMATEN Centre of Excellence, National Centre of Nuclear Research, 7 Andrzeja Soltana Street, 05-400 Otwock, Poland

4 Department of General and Coordination Chemistry and Crystallography, Institute of Chemical Sciences, Faculty of Chemistry, Maria Curie-Skłodowska University in Lublin, Maria Curie-Skłodowska Sq. 2, 20-031 Lublin, Poland

\* Correspondence: m.kalinowska@pb.edu.pl

**Table S1.** Sources of CQA with extraction and determination methods.

| Source                          | CQA amount [mg/g]          | Analytical method                                                             |                                                            |                    |      |
|---------------------------------|----------------------------|-------------------------------------------------------------------------------|------------------------------------------------------------|--------------------|------|
|                                 |                            | Extraction                                                                    | CQA determination                                          | Ref.               |      |
| Potato pellets                  | 0.106 ± 0.004              | Heating at 40°C/30 min                                                        | HPLC                                                       | [30]               |      |
|                                 | 0.102 ± 0.007              | Maceration at RT/48 h                                                         |                                                            |                    |      |
|                                 | 0.049 ± 0.003              | Soxhlet                                                                       |                                                            |                    |      |
|                                 | 0.083 ± 0.001              | Reflux                                                                        |                                                            |                    |      |
|                                 | 0.032 ± 0.004              | Percolation                                                                   |                                                            |                    |      |
|                                 | 0.094 ± 0.005              | Ultrasound                                                                    |                                                            |                    |      |
| Etlingera elatior fresh leaves  | 2.94 ± 0.53                | Methanolic extraction and filtration                                          | HPLC                                                       | [31]               |      |
| Etlingera fulgens fresh leaves  | 2.19 ± 0.14                |                                                                               |                                                            |                    |      |
| Lonicera japonica fresh flowers | 1.15 ± 0.16                |                                                                               |                                                            |                    |      |
| Ipomoea batatas fresh leaves    | 1.73 ± 0.13                |                                                                               |                                                            |                    |      |
| Apples                          | Idared peel                | 0.0715                                                                        | Ultrasonic extraction using methanol acetic acid solution. | Reverse-phase HPLC | [32] |
|                                 | Idared pulp                | 0.1169                                                                        |                                                            |                    |      |
|                                 | Elstar peel                | 0.165 ± 0.013                                                                 |                                                            |                    |      |
|                                 | Elstar pulp                | 0.029 ± 0.002                                                                 |                                                            |                    |      |
|                                 | Fuji peel                  | 0.174 ± 0.039                                                                 |                                                            |                    |      |
|                                 | Fuji pulp                  | 0.107 ± 0.009                                                                 |                                                            |                    |      |
|                                 | Golden Delicious peel      | 0.037–0.017                                                                   |                                                            |                    |      |
|                                 | Golden Delicious pulp      | 0.057–0.029                                                                   |                                                            |                    |      |
|                                 | Granny Smith peel          | 0.06–0.006                                                                    |                                                            |                    |      |
|                                 | Granny Smith pulp          | 0.071–0.028                                                                   |                                                            |                    |      |
|                                 | McIntosh peel              | 0.2345                                                                        |                                                            |                    |      |
|                                 | McIntosh pulp              | 0.1512                                                                        |                                                            |                    |      |
|                                 | Pinova peel                | 0.248 ± 0.019                                                                 |                                                            |                    |      |
|                                 | Pinova pulp                | 0.067 ± 0.002                                                                 |                                                            |                    |      |
| Green ground coffee             | 47                         | Extraction using rotatory shaker and isopropanol solution.                    | Folin-Ciocalteu assay (UV-Vis)                             | [33]               |      |
| Regular coffee                  | 3.95–1.32 (3-CQA)          | Brewed coffee treated with Carrez reagents I, II and methanol, then filtered. | HPLC                                                       | [34]               |      |
|                                 | 4.56–1.44 (4-CQA)          |                                                                               |                                                            |                    |      |
|                                 | 7.06–2.13 (5-CQA)          |                                                                               |                                                            |                    |      |
|                                 | 3.42–0.45 (3-CQA)          |                                                                               |                                                            |                    |      |
|                                 | 3.78–0.51 (4-CQA)          |                                                                               |                                                            |                    |      |
| Decaffeinated coffee            | 6.23–0.82 (5-CQA)          |                                                                               |                                                            |                    |      |
| Coffee brand                    | Half-dry extraction method |                                                                               |                                                            |                    |      |
| Timor + Yellow Catuai Hybrid    | 5.028 ± 0.20 (3-CQA)       | Extraction using aqueous methanol solution and Carrez solutions.              | HPLC                                                       | [35]               |      |
|                                 | 6.663 ± 0.24 (4-CQA)       |                                                                               |                                                            |                    |      |
|                                 | 43.175 ± 1.02 (5-CQA)      |                                                                               |                                                            |                    |      |
| Timor + Red Cattura Hybrid      | 5.105 ± 0.52 (3-CQA)       |                                                                               |                                                            |                    |      |
| 6.803 ± 0.21 (4-CQA)            |                            |                                                                               |                                                            |                    |      |
| 30.052 ± 0.65 (5-CQA)           |                            |                                                                               |                                                            |                    |      |
| Yellow Bourbon                  | 4.039 ± 0.41 (3-CQA)       |                                                                               |                                                            |                    |      |
|                                 | 5.826 ± 0.74 (4-CQA)       |                                                                               |                                                            |                    |      |
|                                 | 33.050 ± 0.74 (5-CQA)      |                                                                               |                                                            |                    |      |
| Red Catuai                      | 4.379 ± 0.41 (3-CQA)       |                                                                               |                                                            |                    |      |
|                                 | 6.058 ± 0.30 (4-CQA)       |                                                                               |                                                            |                    |      |

|                            |                       |                                                                                               |         |      |
|----------------------------|-----------------------|-----------------------------------------------------------------------------------------------|---------|------|
|                            | 32.263 ± 0.41 (5-CQA) |                                                                                               |         |      |
|                            | 4.459 ± 0.17 (3-CQA)  |                                                                                               |         |      |
| Rubi                       | 6.179 ± 0.25 (4-CQA)  |                                                                                               |         |      |
|                            | 31.915 ± 0.54 (5-CQA) |                                                                                               |         |      |
|                            | 5.360 ± 0.15 (3-CQA)  |                                                                                               |         |      |
| Topázio                    | 6.894 ± 0.28 (4-CQA)  |                                                                                               |         |      |
|                            | 32.512 ± 0.35 (5-CQA) |                                                                                               |         |      |
| Wet extraction method      |                       |                                                                                               |         |      |
|                            | 5.404 ± 0.74 (3-CQA)  |                                                                                               |         |      |
| Timor + Yellow             | 7.323 ± 0.20 (4-CQA)  |                                                                                               |         |      |
| Catuai Hybrid              | 48.451 ± 0.84 (5-CQA) |                                                                                               |         |      |
|                            | 5.063 ± 0.14 (3-CQA)  |                                                                                               |         |      |
| Timor + Red Cattura Hybrid | 6.620 ± 0.31 (4-CQA)  |                                                                                               |         |      |
|                            | 35.278 ± 0.15 (5-CQA) |                                                                                               |         |      |
|                            | 5.015 ± 0.17 (3-CQA)  |                                                                                               |         |      |
| Yellow Bourbon             | 6.052 ± 0.16 (4-CQA)  | Extraction conducted on soaked cherries using aqueous methanol solution and Carrez solutions. | HPLC    | [35] |
|                            | 34.102 ± 0.18 (5-CQA) |                                                                                               |         |      |
|                            | 5.281 ± 0.23 (3-CQA)  |                                                                                               |         |      |
| Red Catuai                 | 6.853 ± 0.24 (4-CQA)  |                                                                                               |         |      |
|                            | 32.568 ± 0.42 (5-CQA) |                                                                                               |         |      |
|                            | 4.211 ± 0.22 (3-CQA)  |                                                                                               |         |      |
| Rubi                       | 5.718 ± 0.21 (4-CQA)  |                                                                                               |         |      |
|                            | 36.826 ± 0.39 (5-CQA) |                                                                                               |         |      |
|                            | 3.840 ± 0.15 (3-CQA)  |                                                                                               |         |      |
| Topázio                    | 5.032 ± 0.17 (4-CQA)  |                                                                                               |         |      |
|                            | 31.628 ± 0.19 (5-CQA) |                                                                                               |         |      |
|                            | 6.672 ± 0.15 (3-CQA)  |                                                                                               |         |      |
| <i>Coffea arabica</i>      | 8.075 ± 0.13 (4-CQA)  |                                                                                               |         |      |
| Mundo Novo green           | 36.112 ± 0.63 (5-CQA) |                                                                                               |         |      |
|                            | 10.966 ± 0.26 (3-CQA) |                                                                                               |         |      |
| <i>Coffea arabica</i>      | 10.966 ± 0.26 (4-CQA) |                                                                                               |         |      |
| Mundo Novo roasted         | 27.367 ± 0.73 (5-CQA) |                                                                                               |         |      |
|                            | 6.180 ± 0.02 (3-CQA)  |                                                                                               |         |      |
| <i>Coffea arabica</i>      | 7.709 ± 13.4 (4-CQA)  |                                                                                               |         |      |
| Catuai Vermelho green      | 33.574 ± 0.55 (5-CQA) | Methanol-based extraction proces and Carrez solutions.                                        | HPLC-MS | [36] |
|                            | 10.301 ± 0.11 (3-CQA) |                                                                                               |         |      |
| <i>Coffea arabica</i>      | 12.534 ± 0.20 (4-CQA) |                                                                                               |         |      |
| Catuai Vermelho roasted    | 24.519 ± 0.17 (5-CQA) |                                                                                               |         |      |
|                            | 10.656 ± 0.10 (3-CQA) |                                                                                               |         |      |
| <i>Coffea robusta</i>      | 12.772 ± 0.14 (4-CQA) |                                                                                               |         |      |
| Conillon green             | 41.140 ± 0.40 (5-CQA) |                                                                                               |         |      |
|                            | 13.084 ± 0.00 (3-CQA) |                                                                                               |         |      |
| <i>Coffea robusta</i>      | 16.665 ± 0.16 (4-CQA) |                                                                                               |         |      |
| Conillon roasted           | 31.755 ± 0.04 (5-CQA) |                                                                                               |         |      |

**Table S2.** Sources of different CQA isomers.

| Isomers                                                    | Sources                                                  | Content                                                           | Ref.    |
|------------------------------------------------------------|----------------------------------------------------------|-------------------------------------------------------------------|---------|
| 3-CQA, 4-CQA, 5-CQA,<br>3,4-diCQA, 3,5-diCQA,<br>4,5-diCQA | <i>Coffea canephora</i><br>(Robusta)                     | 5-10% d.w. of green beans                                         | [2,4,5] |
|                                                            | <i>Coffea arabica</i> (Arabica)                          | 20-675 mg 5-CQA from 200 ml of roasted,<br>ground coffee infusion |         |
| mono- and diCQA                                            | Tea                                                      | 1599 mg/100 g d.m.                                                | [5]     |
| mono- and diCQA                                            | Yerba mate                                               | 16-41 mg CQA per 200 cm <sup>3</sup> from roasted<br>mate         | [4]     |
|                                                            |                                                          | 480-520 mg of 5-CQA with traditional brewing<br>methods           |         |
| CQAs (mainly 5-CQA)                                        | Pears                                                    | -                                                                 | [2]     |
| CQAs (mainly 5-CQA)                                        | Apples                                                   | 12-31 mg/100 mL of apple juice                                    | [4,5,8] |
| CQAs (mainly 5-CQA)                                        | Plums                                                    | 0.5 mg/g                                                          | [5]     |
| CQAs (mainly 5-CQA)                                        | Cherries                                                 | 0.4 mg/g                                                          | [5]     |
| CQAs (mainly 5-CQA)                                        | Blueberries                                              | 2 mg/g                                                            | [2,5]   |
| CQAs (mainly 5-CQA)                                        | Citrus fruits                                            | -                                                                 | [9]     |
| 5-CQA                                                      | <i>Sorbus domestica</i>                                  | 1500 mg/kg                                                        | [4]     |
| CQAs                                                       | Tomatoes                                                 | 4.22 mg/100 g f.w.                                                | [5]     |
| CQAs                                                       | Brassica vegetables (kale,<br>cabbage, brussels sprouts) | -                                                                 | [4]     |
| CQAs                                                       | Celery vegetables (celery,<br>carrots, cumin, coriander) | -                                                                 | [4]     |
| CQAs                                                       | Sweet potatoes                                           | 0,2 mg/g                                                          | [5]     |
| CQAs                                                       | Potatoes                                                 | 500-1200 mg/kg d.m.                                               | [4]     |
|                                                            |                                                          | 2-5 g/kg in peel                                                  |         |
| CQAs                                                       | Turnips                                                  | 0.083 mg/g                                                        | [5]     |
| CQAs                                                       | Carrots                                                  | 0.062 mg/g                                                        | [5]     |
| CQAs                                                       | <i>Cynara scolymus</i>                                   | -                                                                 | [4]     |
| CQAs                                                       | <i>Scorzonera hispanica</i> L.                           | -                                                                 | [4]     |
| CQAs                                                       | <i>Echinacea purpurea</i> L.<br>Moench                   | -                                                                 | [4]     |
| CQAs                                                       | <i>Achillea millefolium</i> L.                           | -                                                                 | [4]     |
| CQAs                                                       | <i>Silybum marianum</i> L.<br>Gaertner                   | -                                                                 | [4]     |
| CQAs                                                       | <i>Tussilago farfara</i> L.                              | -                                                                 | [4]     |
| CQAs                                                       | <i>Tanacetum vulgare</i> L.                              | -                                                                 | [4]     |
| CQAs                                                       | <i>Matricaria chamomilla</i> L.                          | -                                                                 | [4]     |
| CQAs                                                       | Mugwort                                                  | -                                                                 | [12]    |
| CQAs                                                       | Honeysuckle                                              | -                                                                 | [13]    |

**Table S3.** The wavenumbers, intensities and assignment of selected bands from the FT-IR spectra of Cu(II) and Fe(III) 5-CQAs and 5-CQA acid [7]; the symbols denote:  $\nu$  – stretching vibrations,  $\delta$  – deforming in plane and oop – out of plane bending vibrations; s – strong, m – medium, w – weak, v –very, sh – on the slope.

| 5-CQA |      | Cu(II) 5-CQA |      | Fe(III) 5-CQA |      | Assignment                                                                                                                      |
|-------|------|--------------|------|---------------|------|---------------------------------------------------------------------------------------------------------------------------------|
| IR    | int. | IR           | int. | IR            | int. |                                                                                                                                 |
| 1725  | s    | -            | -    | -             | -    | $\nu(\text{C}=\text{O})_{\text{COOH group}}$                                                                                    |
| 1685  | vs   | 1685         | s    | 1685          | m    | $\nu(\text{C}=\text{O})_{\text{ester group}}$                                                                                   |
| 1638  | s    | -            | -    | -             | -    | $\nu(\text{C}=\text{C})$                                                                                                        |
| 1600  |      | 1594         | vs   | 1614, 1583    | m, m | $\nu(\text{COO}^-)_{\text{asym}}$                                                                                               |
| 1529  | m    | -            | -    | -             | -    | $\nu(\text{CC})_{\text{ar}}$                                                                                                    |
| 1517  | m    | 1515         | m    | 1524          | m    | $\nu(\text{CC})_{\text{ar}}$                                                                                                    |
|       |      | 1493         | m    | 1481          | m    | $\nu(\text{CC})_{\text{ar}}$                                                                                                    |
| 1442  | s    | 1446         | m    | 1429          | m    | $\delta(\text{COH})_{\text{quinic ring}}$                                                                                       |
| -     |      | 1364         | m    | 1356          | m    | $\nu(\text{COO}^-)_{\text{sym}}$                                                                                                |
| 1323  | m    | -            | -    | -             | -    | $\nu(\text{CC}) + \delta(\text{CCH}) + \delta(\text{COH})_{\text{quinic ring}}$                                                 |
| 1303  | s    | -            | -    | -             | -    | $\nu(\text{CO}) + \nu(\text{CC}) + \delta(\text{CCH})$                                                                          |
| 1286  | vs   | 1261         | vs   | 1259          | vs   | $\nu(\text{C}-\text{O})_{\text{catechol group}} + \delta(\text{CH})_{\text{ar}}$                                                |
| 1220  | m    | -            | -    | -             | -    | $\nu(\text{CC}) + \nu(\text{CH}) + \delta(\text{CCH}) + \delta(\text{COH})$                                                     |
| 1201  | s    | -            | -    | -             | -    | $\delta(\text{COH})_{\text{quinic ring}}$                                                                                       |
| 1182  | vs   | 1182         | s    | 1181          | s    | $\nu(\text{CC}) + \nu(\text{CH}) + \delta(\text{CCH}) + \delta(\text{COH})$                                                     |
| -     | s    | 1156         | m    | 1154          | m    | $\nu(\text{CC}) + \nu(\text{CH}) + \delta(\text{CCH}) + \delta(\text{COH})$                                                     |
| 1133  | s    | -            | -    | -             | -    | $\nu(\text{C}-\text{O})_{\text{COOH group}}$                                                                                    |
| 1112  | s    | 1119         | m    | 1119          | s    | $\nu(\text{C}-\text{O})_{\text{ester group}}$                                                                                   |
| 1087  | s    | 1087         | m    | 1085          | s    | $\nu(\text{CC}) + \nu(\text{C}-\text{O})_{\text{quinic ring}}$                                                                  |
| 1073  | w    | -            | -    | -             | -    | $\nu(\text{CC})_{\text{quinic ring}} + \delta(\text{CH})_{\text{quinic ring}}$                                                  |
| 1036  | m    | 1040         | m    | 1039          | m    | $\nu(\text{C}_{\text{quinic ring}}-\text{O}_{\text{in ester group}}) + \delta(\text{CH})_{\text{quinic ring}}$                  |
| 1000  | w    | -            | -    | -             | -    | oop(HC-C=C) + oop(HC=CH)                                                                                                        |
| 970   | m    | 977          | m    | 977           | m    | $\delta(\text{CH})_{\text{quinic ring}} + \delta(\text{CH})_{\text{quinic ring}} + \nu(\text{C}-\text{O})_{\text{quinic ring}}$ |
| 908   | m    | 916          | m    | 915           | m    | $\nu(\text{CC}) + \nu(\text{C}-\text{O})_{\text{quinic ring}} + \delta(\text{CC}) + \delta(\text{CH})$                          |
| 853   | m    | 852          | m    | 852           | m    | $\delta(\text{HC}-\text{CO}) + \text{oop}(\text{CH})_{\text{ester group}}$                                                      |
| 818   | s    | -            | -    | -             | -    | $\delta(\text{CC})_{\text{arom. ring}}$                                                                                         |
| -     |      | 813          | s    | 813           | s    | $\delta(\text{CC})_{\text{arom. ring}} + \delta(\text{COO}^-)$                                                                  |
| 596   |      | 615          | m    | 612           | m    | oop(COO <sup>-</sup> )                                                                                                          |
